# Supplementary material
Source: publisher figshare collection journal article supplement (https://springernature.figshare.com/ndownloader/files/16379594)
Supplement: Supplementary file 1 [file 16379594]

## Sheet: Weibull Function
Bertin et al. (2019). MatHaz
Years to the past	Cumulative eruptions	Rate (eruptions/year)	T-Calc	Residual		delta	2.00254
-17000	1	0	0	1		theta	2220.71
-16000	2	0.000405243	0.202365	3.23149		t0	-17000	years
-15000	3	0.000811913	0.810885	4.79223
-14000	4	0.00121912	1.82637	4.72467		SSRR	267.365	<-- minimize this (Sum of Squared Relative Residuals) by varying the cells containing delta and theta using the Solver function
-13000	5	0.00162669	3.24925	3.06513
-12500	6	0.00183057	4.11356	3.55866
-12400	7	0.00187135	4.29866	7.29726
-12250	8	0.00193253	4.58395	11.6694
-12000	9	0.00203451	5.07983	15.3678
-11000	10	0.00244254	7.31833	7.19133
-10000	11	0.00285074	9.96496	1.0713
-9950	12	0.00287116	10.108	3.57962
-9500	13	0.0030549	11.4414	2.42932
-9000	14	0.0032591	13.0199	0.960649
-8650	15	0.00340205	14.1856	0.66329
-8450	16	0.00348375	14.8742	1.26753
-8250	17	0.00356545	15.5791	2.01903
-8150	18	0.0036063	15.9377	4.25324
-8000	19	0.00366758	16.4832	6.33427
-7500	20	0.00387187	18.3681	2.66322
-7000	21	0.00407618	20.3551	0.41593
-6750	22	0.00417835	21.3869	0.375905
-6500	23	0.00428052	22.4442	0.308862
-6250	24	0.0043827	23.5271	0.223588
-6000	25	0.00448488	24.6356	0.13279
-5750	26	0.00458707	25.7696	0.0530887
-5250	27	0.00479147	28.1142	1.2415
-5000	28	0.00489368	29.3249	1.75528
-4800	29	0.00497545	30.3118	1.72077
-4600	30	0.00505722	31.315	1.72935
-4500	31	0.00509811	31.8228	0.677025
-4200	32	0.00522078	33.3706	1.87868
-4000	33	0.00530256	34.423	2.02488
-3700	34	0.00542524	36.0322	4.12965
-3500	35	0.00550703	37.1254	4.51724
-3400	36	0.00554793	37.6781	2.81612
-3200	37	0.00562973	38.7959	3.22524
-3000	38	0.00571153	39.93	3.72498
-2850	39	0.00577288	40.7913	3.20893
-2550	40	0.00589558	42.5416	6.45983
-2500	41	0.00591604	42.8369	3.37424
-2300	42	0.00599784	44.0283	4.11399
-2000	43	0.00612056	45.8461	8.10005
-1750	44	0.00622283	47.389	11.4852
-1700	45	0.00624329	47.7006	7.29343
-1600	46	0.0062842	48.327	5.41497
-1500	47	0.00632511	48.9575	3.83171
-1400	48	0.00636602	49.592	2.53456
-1300	49	0.00640693	50.2307	1.51457
-1200	50	0.00644784	50.8734	0.762858
-1100	51	0.00648876	51.5202	0.270658
-900	52	0.00657058	52.8262	0.682576
-800	53	0.0066115	53.4853	0.235502
-750	54	0.00663196	53.8164	0.0337192
-700	55	0.00665241	54.1485	0.725084
-600	56	0.00669333	54.8158	1.4024
-500	57	0.00673425	55.4871	2.28872
-400	58	0.00677517	56.1626	3.37597
-225	59	0.00684677	57.3545	2.70755
-200	60	0.006857	57.5258	6.12149
-150	61	0.00687746	57.8692	9.80193
-100	62	0.00689792	58.2136	14.337
-60	63	0.00691429	58.4898	20.3417
-40	64	0.00692247	58.6282	28.8563
0		0.00693884	58.9054
40		0.00695521	59.1833
100		0.00697976	59.6013
